# Supplementary material for: An assessment of climate change vulnerability for Important Bird Areas in the Bering Sea and Aleutian Arc
Source: PLOS journal article supplement (doi:10.1371/journal.pone.0214573), 2019-04-17
Supplement: S3 (10.1371/journal.pone.0214573.s003) [file journal.pone.0214573.s003]

**S3 Table. Model vulnerability agreement, by species core area. Values in bold indicate core areas where all three model results exceeded the climate vulnerability threshold.**

| LME              | Species | IBA                                | Season | Shallow<br>SWT | Deep<br>SWT | Sea<br>Ice<br>Cover | Large<br>Copepods | Euphausiids | Benthic<br>Infauna |
|------------------|---------|------------------------------------|--------|----------------|-------------|---------------------|-------------------|-------------|--------------------|
| Aleutian Islands | ANMU    | Buldir & Near Islands Marine       | Summer | 67%            | 67%         |                     |                   | 0%          |                    |
| Aleutian Islands | ANMU    | Buldir Island Colony               | Summer | 67%            | 67%         |                     |                   | 33%         |                    |
| Aleutian Islands | ANMU    | Fenimore Pass & Atka Island Marine | Summer | <b>100%</b>    | <b>100%</b> |                     |                   | 67%         |                    |
| Aleutian Islands | ANMU    | Koniuji-Atka Island Colony         | Summer | <b>100%</b>    | <b>100%</b> |                     |                   | 67%         |                    |
| Aleutian Islands | BLKI    | Buldir Island Colony               | Summer | 67%            | 67%         |                     |                   | 33%         |                    |
| Aleutian Islands | CRAU    | Buldir Island Colony               | Summer | 67%            | 67%         |                     | 67%               | 33%         |                    |
| Aleutian Islands | CRAU    | Gareloi Island Marine              | Summer | <b>100%</b>    | <b>100%</b> |                     | 33%               | 33%         |                    |
| Aleutian Islands | FTSP    | Buldir Island Colony               | Summer | 67%            | 67%         |                     | 67%               | 33%         |                    |
| Aleutian Islands | FTSP    | Koniuji-Atka Island Colony         | Summer | <b>100%</b>    | <b>100%</b> |                     | 33%               | 67%         |                    |
| Aleutian Islands | GWGU    | Buldir & Near Islands Marine       | Summer | 33%            | 67%         |                     |                   | 33%         |                    |
| Aleutian Islands | GWGU    | Fenimore Pass & Atka Island Marine | Summer | <b>100%</b>    | <b>100%</b> |                     |                   | 67%         |                    |
| Aleutian Islands | GWGU    | Fenimore Pass & Atka Island Marine | Summer | <b>100%</b>    | <b>100%</b> |                     |                   | 67%         |                    |
| Aleutian Islands | GWGU    | Fenimore Pass & Atka Island Marine | Winter | <b>100%</b>    | <b>100%</b> |                     |                   | 67%         |                    |
| Aleutian Islands | GWGU    | Kiska Island Colonies              | Summer | 67%            | 67%         |                     |                   | 33%         |                    |
| Aleutian Islands | LEAU    | Gareloi Island Marine              | Summer | <b>100%</b>    | <b>100%</b> |                     | 33%               | 33%         |                    |
| Aleutian Islands | LEAU    | Kiska Island Marine                | Summer | 67%            | 67%         |                     | 33%               | 33%         |                    |
| Aleutian Islands | LEAU    | Segula & Davidof Islands Colonies  | Summer | 33%            | 67%         |                     | 33%               | 33%         |                    |
| Aleutian Islands | LESP    | Buldir Island Colony               | Summer | 67%            | 67%         |                     | 67%               | 33%         |                    |
| Aleutian Islands | NOFU    | Chagulak Island Marine             | Summer | <b>100%</b>    | <b>100%</b> |                     |                   | 0%          |                    |
| Aleutian Islands | NOFU    | Chagulak Island Marine             | Winter | <b>100%</b>    | <b>100%</b> |                     |                   | <b>100%</b> |                    |
| Aleutian Islands | NOFU    | Seguam Island Marine               | Summer | <b>100%</b>    | <b>100%</b> |                     |                   | 33%         |                    |
| Aleutian Islands | PAAU    | Buldir & Near Islands Marine       | Summer | 67%            | 67%         |                     | 33%               | 67%         |                    |
| Aleutian Islands | PAAU    | Buldir Island Colony               | Summer | 67%            | 67%         |                     | 67%               | 33%         |                    |
| Aleutian Islands | PAAU    | Fenimore Pass & Atka Island Marine | Summer | <b>100%</b>    | <b>100%</b> |                     | 33%               | 67%         |                    |
| Aleutian Islands | PAAU    | Gareloi Island Marine              | Summer | <b>100%</b>    | <b>100%</b> |                     | 33%               | 33%         |                    |
| Aleutian Islands | RLKI    | Buldir Island Colony               | Summer | 67%            | 67%         |                     |                   | 33%         |                    |
| Aleutian Islands | WHAU    | Amchitka Pass 180W51N              | Summer | 67%            | 67%         |                     | 33%               | 33%         |                    |

| <b>LME</b>         | <b>Species</b> | <b>IBA</b>                          | <b>Season</b> | <b>Shallow<br/>SWT</b> | <b>Deep<br/>SWT</b> | <b>Sea<br/>Ice<br/>Cover</b> | <b>Large<br/>Copepods</b> | <b>Euphausiids</b> | <b>Benthic<br/>Infauna</b> |
|--------------------|----------------|-------------------------------------|---------------|------------------------|---------------------|------------------------------|---------------------------|--------------------|----------------------------|
| Aleutian Islands   | WHAU           | Buldir & Near Islands Marine        | Summer        | 67%                    | 67%                 |                              | 33%                       | 33%                |                            |
| Aleutian Islands   | WHAU           | Buldir Island Colony                | Summer        | 67%                    | 67%                 |                              | 67%                       | 33%                |                            |
| Aleutian Islands   | WHAU           | Fenimore Pass & Atka Island Marine  | Summer        | <b>100%</b>            | <b>100%</b>         |                              | 33%                       | 67%                |                            |
| Aleutian Islands   | WHAU           | Fenimore Pass & Atka Island Marine  | Summer        | <b>100%</b>            | <b>100%</b>         |                              | 33%                       | 67%                |                            |
| Aleutian Islands   | WHAU           | Gareloi Island Marine               | Summer        | <b>100%</b>            | <b>100%</b>         |                              | 33%                       | 33%                |                            |
| Aleutian Islands   | WHAU           | Kagamil Island Marine               | Summer        | <b>100%</b>            | <b>100%</b>         |                              | 0%                        | 0%                 |                            |
| Aleutian Islands   | WHAU           | Kiska Island Marine                 | Summer        | 67%                    | 67%                 |                              | 33%                       | 33%                |                            |
| Aleutian Islands   | WHAU           | Seguam Island Marine                | Summer        | <b>100%</b>            | <b>100%</b>         |                              | 33%                       | 33%                |                            |
| Eastern Bering Sea | BLKI           | Cape Peirce & Cape Newenham         | Summer        | <b>100%</b>            |                     | <b>100%</b>                  |                           | 0%                 |                            |
| Eastern Bering Sea | BLKI           | Ilnik Marine                        | Summer        | <b>100%</b>            |                     |                              |                           | 0%                 |                            |
| Eastern Bering Sea | BLKI           | Izembek Lagoon & Bechevin Bay       | Summer        | <b>100%</b>            |                     |                              |                           | 67%                |                            |
| Eastern Bering Sea | BLKI           | St. Matthew & Hall Islands Colonies | Summer        | <b>100%</b>            |                     |                              |                           | 67%                |                            |
| Eastern Bering Sea | BLKI           | Unimak & Akutan Passes              | Summer        | <b>100%</b>            | <b>100%</b>         |                              |                           | 33%                |                            |
| Eastern Bering Sea | BLSC           | Northern Alaska Peninsula Coastal   | Spring        | 67%                    |                     |                              |                           |                    | 33%                        |
| Eastern Bering Sea | BLSC           | Northern Alaska Peninsula Coastal   | Spring        | <b>100%</b>            |                     |                              |                           |                    | 33%                        |
| Eastern Bering Sea | BLSC           | Port Moller                         | Fall          | <b>100%</b>            |                     |                              |                           |                    | 33%                        |
| Eastern Bering Sea | BLSC           | Port Moller                         | Spring        | <b>100%</b>            |                     |                              |                           |                    | 33%                        |
| Eastern Bering Sea | CRAU           | St. Matthew & Hall Islands Colonies | Summer        | <b>100%</b>            |                     |                              | 0%                        | 67%                |                            |
| Eastern Bering Sea | CRAU           | Unimak & Akutan Passes              | Winter        | <b>100%</b>            | <b>100%</b>         |                              | 33%                       | <b>100%</b>        |                            |
| Eastern Bering Sea | FTSP           | Bering Sea Shelf Edge 173W58N       | Summer        | <b>100%</b>            | 67%                 |                              | 33%                       | 67%                |                            |
| Eastern Bering Sea | FTSP           | Bering Sea Shelf Edge 178W61N       | Summer        | <b>100%</b>            | 67%                 | <b>100%</b>                  | 33%                       | 0%                 |                            |
| Eastern Bering Sea | GLGU           | Bering Sea Shelf 170W58N            | Winter        | <b>100%</b>            |                     | <b>100%</b>                  |                           | 67%                |                            |
| Eastern Bering Sea | GLGU           | Bering Sea Shelf Edge 174W59N       | Winter        | <b>100%</b>            | 67%                 |                              |                           | <b>100%</b>        |                            |
| Eastern Bering Sea | GWGU           | Bering Sea Shelf 163W56N            | Winter        | <b>100%</b>            | <b>100%</b>         |                              |                           | 33%                |                            |
| Eastern Bering Sea | GWGU           | Bering Sea Shelf 165W56N            | Winter        | <b>100%</b>            |                     |                              |                           | 33%                |                            |
| Eastern Bering Sea | GWGU           | Bering Sea Shelf 166W56N            | Winter        | <b>100%</b>            | <b>100%</b>         |                              |                           | 33%                |                            |
| Eastern Bering Sea | GWGU           | Bering Sea Shelf 166W57N            | Winter        | <b>100%</b>            | <b>100%</b>         |                              |                           | 33%                |                            |
| Eastern Bering Sea | GWGU           | Bering Sea Shelf Edge 166W55N       | Winter        | <b>100%</b>            | <b>100%</b>         |                              |                           | <b>100%</b>        |                            |
| Eastern Bering Sea | GWGU           | Bering Sea Shelf Edge 168W56N       | Winter        | <b>100%</b>            | <b>100%</b>         |                              |                           | 33%                |                            |

| <b>LME</b>         | <b>Species</b> | <b>IBA</b>                          | <b>Season</b> | <b>Shallow<br/>SWT</b> | <b>Deep<br/>SWT</b> | <b>Sea<br/>Ice<br/>Cover</b> | <b>Large<br/>Copepods</b> | <b>Euphausiids</b> | <b>Benthic<br/>Infauna</b> |
|--------------------|----------------|-------------------------------------|---------------|------------------------|---------------------|------------------------------|---------------------------|--------------------|----------------------------|
| Eastern Bering Sea | GWGU           | Cape Tanak Marine                   | Winter        | 100%                   | 100%                |                              |                           | 100%               |                            |
| Eastern Bering Sea | GWGU           | Izembek Lagoon & Bechevin Bay       | Fall          | 100%                   |                     |                              |                           | 67%                |                            |
| Eastern Bering Sea | GWGU           | Northern Alaska Peninsula Coastal   | Fall          | 100%                   |                     |                              |                           | 33%                |                            |
| Eastern Bering Sea | GWGU           | Port Moller                         | Fall          | 100%                   |                     |                              |                           | 33%                |                            |
| Eastern Bering Sea | GWGU           | Unimak & Akutan Passes              | Summer        | 100%                   | 100%                |                              |                           | 33%                |                            |
| Eastern Bering Sea | KIEI           | Cape Vancouver Marine               | Spring        | 100%                   |                     | 100%                         |                           |                    | 67%                        |
| Eastern Bering Sea | KIEI           | Northern Alaska Peninsula Coastal   | Spring        | 100%                   |                     |                              |                           |                    | 33%                        |
| Eastern Bering Sea | KIEI           | Nushagak & Kvichak Bays             | Spring        | 100%                   |                     | 100%                         |                           |                    | 67%                        |
| Eastern Bering Sea | KIMU           | Unimak & Akutan Passes              | Summer        | 100%                   | 100%                |                              |                           | 33%                |                            |
| Eastern Bering Sea | LEAU           | St. Matthew & Hall Islands Colonies | Summer        | 100%                   |                     | 100%                         | 0%                        | 33%                |                            |
| Eastern Bering Sea | NOFU           | Bering Sea Shelf Edge 174W59N       | Summer        | 100%                   | 67%                 |                              |                           | 67%                |                            |
| Eastern Bering Sea | NOFU           | St. Matthew & Hall Islands Colonies | Summer        | 100%                   |                     |                              |                           | 67%                |                            |
| Eastern Bering Sea | PAAU           | St. Matthew & Hall Islands Colonies | Summer        | 100%                   |                     | 100%                         | 0%                        | 33%                |                            |
| Eastern Bering Sea | PAAU           | St. Paul Island Colony              | Summer        | 100%                   |                     |                              | 33%                       | 33%                |                            |
| Eastern Bering Sea | RLKI           | St. George Island Marine            | Summer        | 100%                   | 100%                |                              |                           | 33%                |                            |
| Eastern Bering Sea | RLKI           | St. George Island Marine            | Winter        | 100%                   | 100%                |                              |                           | 33%                |                            |
| Eastern Bering Sea | SOSH           | Unimak & Akutan Passes              | Summer        | 100%                   | 100%                |                              |                           | 33%                |                            |
| Eastern Bering Sea | STEI           | Izembek Lagoon & Bechevin Bay       | Fall          | 100%                   |                     |                              |                           |                    | 67%                        |
| Eastern Bering Sea | STEI           | Izembek Lagoon & Bechevin Bay       | Spring        | 100%                   |                     |                              |                           |                    | 33%                        |
| Eastern Bering Sea | STEI           | Jacksmith Bay to Cape Pierce        | Spring        | 100%                   |                     | 100%                         |                           |                    | 33%                        |
| Eastern Bering Sea | STEI           | Kuskokwim Bay                       | Spring        | 100%                   |                     | 100%                         |                           |                    | 67%                        |
| Eastern Bering Sea | STEI           | Northern Alaska Peninsula Coastal   | Fall          | 100%                   |                     |                              |                           |                    | 33%                        |
| Eastern Bering Sea | STEI           | Northern Alaska Peninsula Coastal   | Spring        | 100%                   |                     |                              |                           |                    | 33%                        |
| Eastern Bering Sea | STEI           | Port Moller                         | Fall          | 100%                   |                     |                              |                           |                    | 33%                        |
| Eastern Bering Sea | STEI           | Port Moller                         | Spring        | 100%                   |                     |                              |                           |                    | 33%                        |
| Eastern Bering Sea | STSH           | Unimak & Akutan Passes              | Summer        | 100%                   | 100%                |                              |                           | 33%                |                            |
| Eastern Bering Sea | TBMU           | St. Matthew & Hall Islands Colonies | Summer        | 100%                   |                     |                              |                           | 67%                |                            |
| Eastern Bering Sea | WHAU           | Unimak & Akutan Passes              | Summer        | 100%                   | 100%                |                              | 33%                       | 0%                 |                            |
| Eastern Bering Sea | WHAU           | Unimak & Akutan Passes              | Winter        | 100%                   | 100%                |                              | 33%                       | 100%               |                            |

| <b>LME</b>          | <b>Species</b> | <b>IBA</b>                         | <b>Season</b> | <b>Shallow<br/>SWT</b> | <b>Deep<br/>SWT</b> | <b>Sea<br/>Ice<br/>Cover</b> | <b>Large<br/>Copepods</b> | <b>Euphausiids</b> | <b>Benthic<br/>Infauna</b> |
|---------------------|----------------|------------------------------------|---------------|------------------------|---------------------|------------------------------|---------------------------|--------------------|----------------------------|
| Eastern Bering Sea  | WWSC           | Ilnik Marine                       | Winter        | 100%                   |                     |                              |                           |                    | 33%                        |
| Eastern Bering Sea  | WWSC           | Northern Alaska Peninsula Coastal  | Spring        | 67%                    |                     |                              |                           |                    | 33%                        |
| Northern Bering Sea | BLKI           | Diomed Islands Colonies            | Summer        | 100%                   |                     |                              |                           | 0%                 |                            |
| Northern Bering Sea | CRAU           | Diomed Islands Colonies            | Summer        | 67%                    |                     | 67%                          | 33%                       | 0%                 |                            |
| Northern Bering Sea | CRAU           | Savoonga Colonies                  | Summer        | 100%                   |                     | 33%                          | 33%                       | 0%                 |                            |
| Northern Bering Sea | CRAU           | Southwest Cape Colonies            | Summer        | 67%                    |                     | 100%                         | 0%                        | 0%                 |                            |
| Northern Bering Sea | CRAU           | Western St. Lawrence Island Marine | Summer        | 67%                    |                     | 67%                          | 0%                        | 33%                |                            |
| Northern Bering Sea | LEAU           | Savoonga Colonies                  | Summer        | 100%                   |                     | 33%                          | 33%                       | 0%                 |                            |
| Northern Bering Sea | PAAU           | Bering Strait                      | Summer        | 67%                    |                     | 67%                          | 33%                       | 0%                 |                            |
| Northern Bering Sea | PAAU           | Diomed Islands Colonies            | Summer        | 67%                    |                     | 67%                          | 33%                       | 0%                 |                            |
| Northern Bering Sea | PAAU           | King Island Colony                 | Summer        | 100%                   |                     |                              | 0%                        | 0%                 |                            |
| Northern Bering Sea | SPEI           | East Norton Sound                  | Summer        | 33%                    |                     | 67%                          |                           |                    | 0%                         |
| Northern Bering Sea | SPEI           | St. Lawrence Island Polynya        | Winter        | 100%                   |                     | 100%                         |                           |                    | 33%                        |
| Northern Bering Sea | SPEI           | Western St. Lawrence Island Marine | Summer        | 67%                    |                     | 100%                         |                           |                    | 0%                         |
| Gulf of Alaska      | ALTE           | Eastern Kodiak Island Marine       | Summer        | 100%                   |                     |                              |                           | 33%                |                            |
| Gulf of Alaska      | ANMU           | Castle Rock Colonies               | Summer        | 67%                    |                     |                              |                           | 33%                |                            |
| Gulf of Alaska      | ANMU           | Cherni Island Complex Colonies     | Summer        | 100%                   |                     |                              |                           | 33%                |                            |
| Gulf of Alaska      | ANMU           | Shumagin Islands Marine            | Summer        | 100%                   | 67%                 |                              |                           | 0%                 |                            |
| Gulf of Alaska      | BLKI           | Barren Islands Colonies            | Summer        | 67%                    |                     |                              |                           | 0%                 |                            |
| Gulf of Alaska      | BLKI           | Castle Rock Colonies               | Summer        | 67%                    |                     |                              |                           | 33%                |                            |
| Gulf of Alaska      | BLKI           | Semidi Islands Colonies            | Summer        | 67%                    | 67%                 |                              |                           | 0%                 |                            |
| Gulf of Alaska      | BLKI           | Spitz Island Colony                | Summer        | 67%                    |                     |                              |                           | 0%                 |                            |
| Gulf of Alaska      | BLSC           | Kachemak Bay                       | Winter        | 67%                    |                     |                              |                           |                    | 33%                        |
| Gulf of Alaska      | BLSC           | Marmot Bay                         | Winter        | 100%                   |                     |                              |                           |                    | 67%                        |
| Gulf of Alaska      | CAAU           | Castle Rock Colonies               | Summer        | 67%                    |                     |                              | 0%                        | 33%                |                            |
| Gulf of Alaska      | CAAU           | Cherni Island Complex Colonies     | Summer        | 100%                   |                     |                              | 33%                       | 33%                |                            |
| Gulf of Alaska      | CAAU           | Gulf of Alaska Shelf 155W57N       | Summer        | 67%                    | 100%                |                              | 0%                        | 0%                 |                            |
| Gulf of Alaska      | GWGU           | Bird Island Colony                 | Summer        | 100%                   |                     |                              |                           | 33%                |                            |
| Gulf of Alaska      | GWGU           | Cape Douglas to Amalik Bay         | Fall          | 67%                    | 100%                |                              |                           | 0%                 |                            |

| <b>LME</b>       | <b>Species</b> | <b>IBA</b>                        | <b>Season</b> | <b>Shallow<br/>SWT</b>  | <b>Deep<br/>SWT</b>    | <b>Sea<br/>Ice<br/>Cover</b> | <b>Large<br/>Copepods</b> | <b>Euphausiids</b>    | <b>Benthic<br/>Infauna</b> |
|------------------|----------------|-----------------------------------|---------------|-------------------------|------------------------|------------------------------|---------------------------|-----------------------|----------------------------|
| Gulf of Alaska   | GWGU           | Cold & Morzhovoi Bays             | Summer        | <b>100%</b>             |                        |                              |                           | 33%                   |                            |
| Gulf of Alaska   | GWGU           | Gulf of Alaska Shelf 151W58N      | Winter        | 67%                     | 67%                    |                              |                           | 67%                   |                            |
| Gulf of Alaska   | GWGU           | Gulf of Alaska Shelf Edge 163W54N | Winter        | <b>100%</b>             | <b>100%</b>            |                              |                           | 67%                   |                            |
| Gulf of Alaska   | GWGU           | Kenai Fjords                      | Fall          | 67%                     | 33%                    |                              |                           | 33%                   |                            |
| Gulf of Alaska   | GWGU           | Kenai Fjords                      | Summer        | 67%                     |                        |                              |                           | 0%                    |                            |
| Gulf of Alaska   | GWGU           | Lower Cook Inlet 153W59N          | Winter        | 67%                     |                        |                              |                           | 67%                   |                            |
| Gulf of Alaska   | GWGU           | Sanak Islands Marine              | Summer        | <b>100%</b>             | <b>100%</b>            |                              |                           | 0%                    |                            |
| Gulf of Alaska   | HADU           | Cape Douglas to Amalik Bay        | Fall          | 67%                     | <b>100%</b>            |                              |                           |                       | 33%                        |
| Gulf of Alaska   | KIMU           | Kachemak Bay                      | Summer        | 67%                     |                        |                              |                           | 0%                    |                            |
| Gulf of Alaska   | LESP           | Cherni Island Complex Colonies    | Summer        | <b>100%</b>             |                        |                              | 33%                       | 33%                   |                            |
| Gulf of Alaska   | MAMU           | Kachemak Bay                      | Summer        | 67%                     |                        |                              |                           | 0%                    |                            |
| Gulf of Alaska   | NOFU           | Semidi Islands Colonies           | Summer        | 67%                     |                        |                              |                           | 0%                    |                            |
| Gulf of Alaska   | PAAU           | Castle Rock Colonies              | Summer        | 67%                     |                        |                              | 0%                        | 33%                   |                            |
| Gulf of Alaska   | PAAU           | Koniuji-Shumagin Islands Colonies | Summer        | <b>100%</b>             | <b>100%</b>            |                              | 0%                        | 0%                    |                            |
| Gulf of Alaska   | PAAU           | Semidi Islands Colonies           | Summer        | 67%                     |                        |                              | 0%                        | 0%                    |                            |
| Gulf of Alaska   | PAAU           | Shumagin Islands Marine           | Summer        | <b>100%</b>             | <b>100%</b>            |                              | 0%                        | 0%                    |                            |
| Gulf of Alaska   | PIGU           | Kenai Fjords                      | Summer        | 67%                     | 33%                    |                              |                           |                       | 33%                        |
| Gulf of Alaska   | STEI           | Chiniak Bay                       | Winter        | <b>100%</b>             |                        |                              |                           |                       | 33%                        |
| Gulf of Alaska   | STEI           | Clam Gulch                        | Spring        | 67%                     |                        |                              |                           |                       | 67%                        |
| Gulf of Alaska   | STEI           | Kamishak Bay                      | Spring        | 67%                     |                        |                              |                           |                       | 67%                        |
| Gulf of Alaska   | STEI           | Sitkinak Strait                   | Spring        | 67%                     |                        |                              |                           |                       | 67%                        |
| Gulf of Alaska   | WWSC           | Cape Douglas to Amalik Bay        | Winter        | 67%                     |                        |                              |                           |                       | 67%                        |
| Gulf of Alaska   | WWSC           | Eastern Kodiak Island Marine      | Winter        | 67%                     | <b>100%</b>            |                              |                           |                       | 33%                        |
| Gulf of Alaska   | WWSC           | Kachemak Bay                      | Winter        | 67%                     |                        |                              |                           |                       | 33%                        |
| All models agree |                |                                   |               | <b>86/138<br/>(62%)</b> | <b>42/68<br/>(62%)</b> | <b>12/19<br/>(63%)</b>       | <b>0/46<br/>(0%)</b>      | <b>6/107<br/>(6%)</b> | <b>0/31<br/>(0%)</b>       |
